# Supplementary material for: Double-shelled hollow mesoporous silica nanospheres as an acid–base bifunctional catalyst for cascade reactions
Source: Royal Society of Chemistry journal article supplement (doi:10.1039/c7nj04670g), 2018-01-01
Supplement: c7nj04670g1.pdf [file c7nj04670g1.pdf]

Type of manuscript: **Article**

## **Supporting Information**

### **Double-shelled hollow mesoporous silica nanosphere as acid-base bifunctional catalyst for cascade reactions**

Chunzi You<sup>1,‡</sup>, Chunqi Yu<sup>1,‡</sup>, Xiaohui Yang<sup>1</sup>, Yudong Li<sup>1</sup>, Hang Huo<sup>1</sup>, Zhe Wang<sup>1</sup>, Yanqiu Jiang,<sup>1,\*</sup>  
Xianzhu Xu,<sup>1,\*</sup> and Kaifeng Lin<sup>1,2</sup>

<sup>1</sup> MIIT Key Laboratory of Critical Materials Technology for New Energy Conversion and Storage, School of Chemistry and Chemical Engineering, Harbin Institute of Technology, Harbin 150001, China.

<sup>2</sup> Key Laboratory of Advanced Energy Materials Chemistry (Ministry of Education), Nankai University, Tianjin 300071, China

‡ C. You and C. Yu contributed equally to this work.

Emails of corresponding authors: [jiangyanqiu@hit.edu.cn](mailto:jiangyanqiu@hit.edu.cn); [xuxianzhu@hit.edu.cn](mailto:xuxianzhu@hit.edu.cn)

**Supporting Figures (S1-S5).**

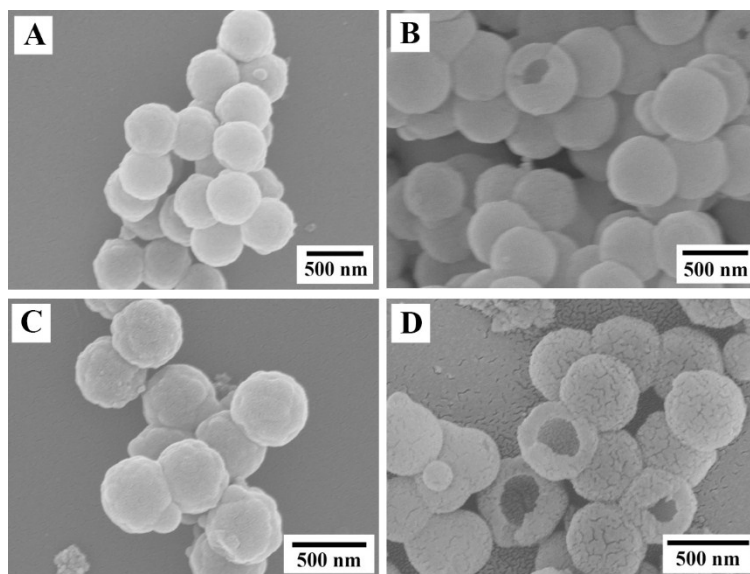

Fig. S1 SEM images of (A) HMS-Al-10, (B) HMS-Al@MS-NH<sub>2</sub>-10, (C) HMS-Al-100 and (D) HMS-Al@MS-NH<sub>2</sub>-100.

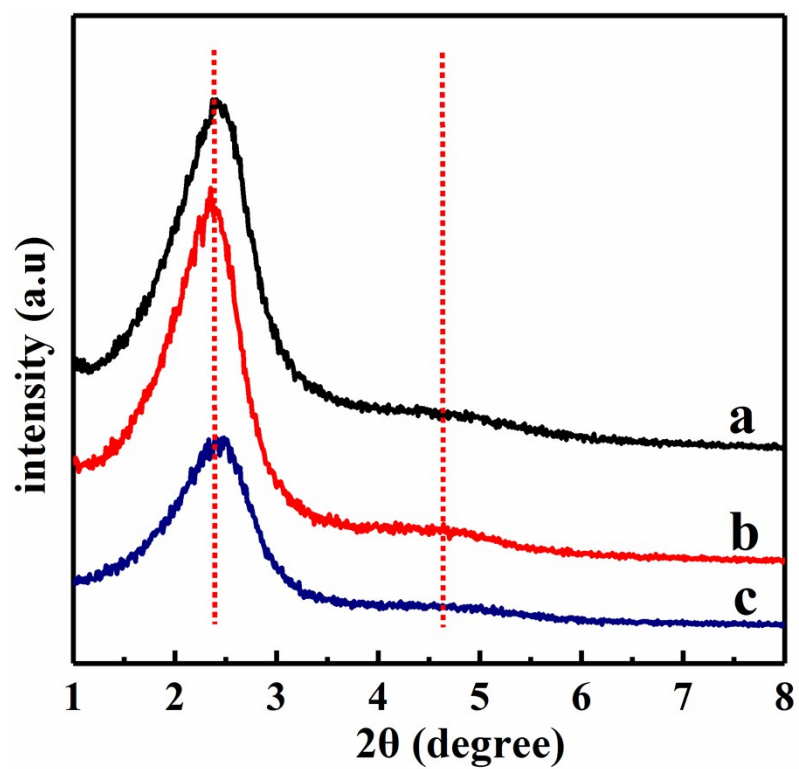

Figure S2 X-ray powder diffraction patterns of a) HMS-Al@MS-NH<sub>2</sub>-10, b) HMS-Al@MS-NH<sub>2</sub>-25 and c) HMS-Al@MS-NH<sub>2</sub>-100.

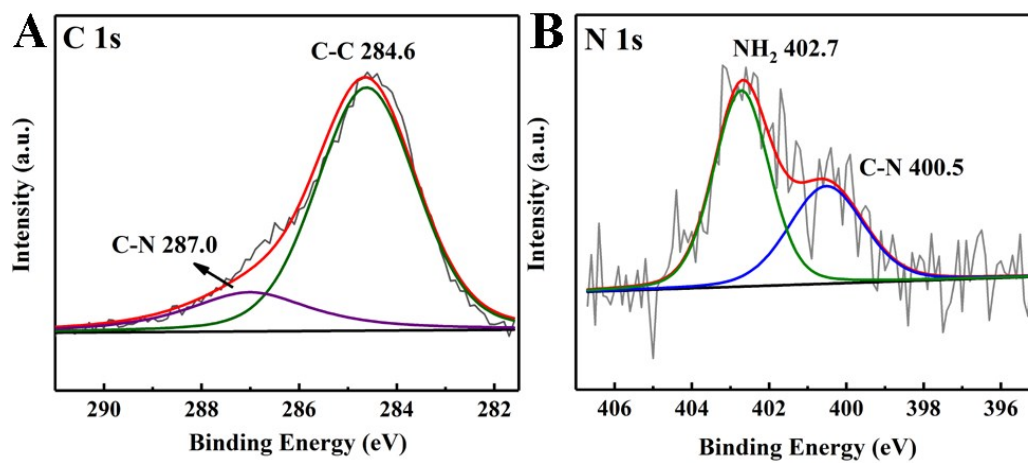

Figure S3 XPS spectra of the HMS-Al@MS-NH<sub>2</sub>-25 composite: (A) C 1s and (B) N 1s.

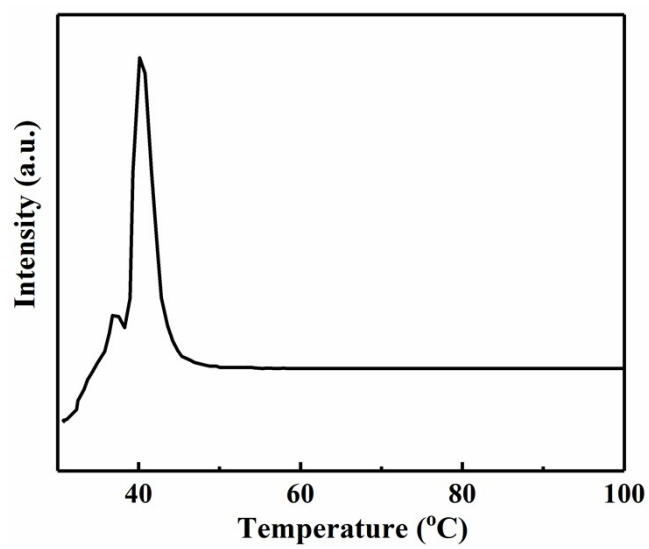

Figure S4 CO<sub>2</sub>-TPD spectrum of HMS-Al@MS-NH<sub>2</sub>-25.

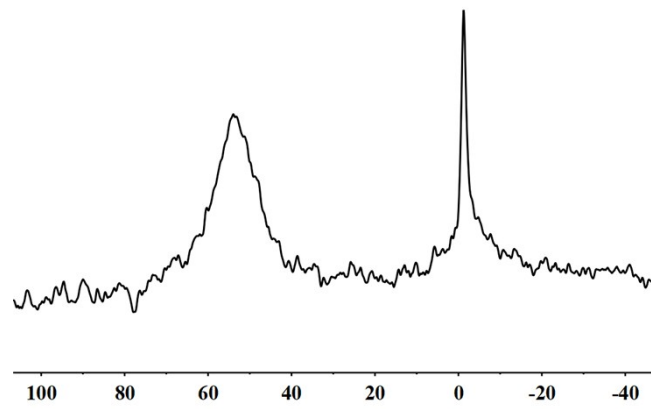

Figure S5  $^{27}\text{Al}$  MAS NMR spectrum of HMS-Al@MS-NH<sub>2</sub>-25.
